# Supplementary material for: Comparative Genomics and Transcriptomics Analyses Reveal Divergent Plant Biomass-Degrading Strategies in Fungi
Source: MDPI journal article supplement (doi:10.3390/jof9080860), 2023-08-18

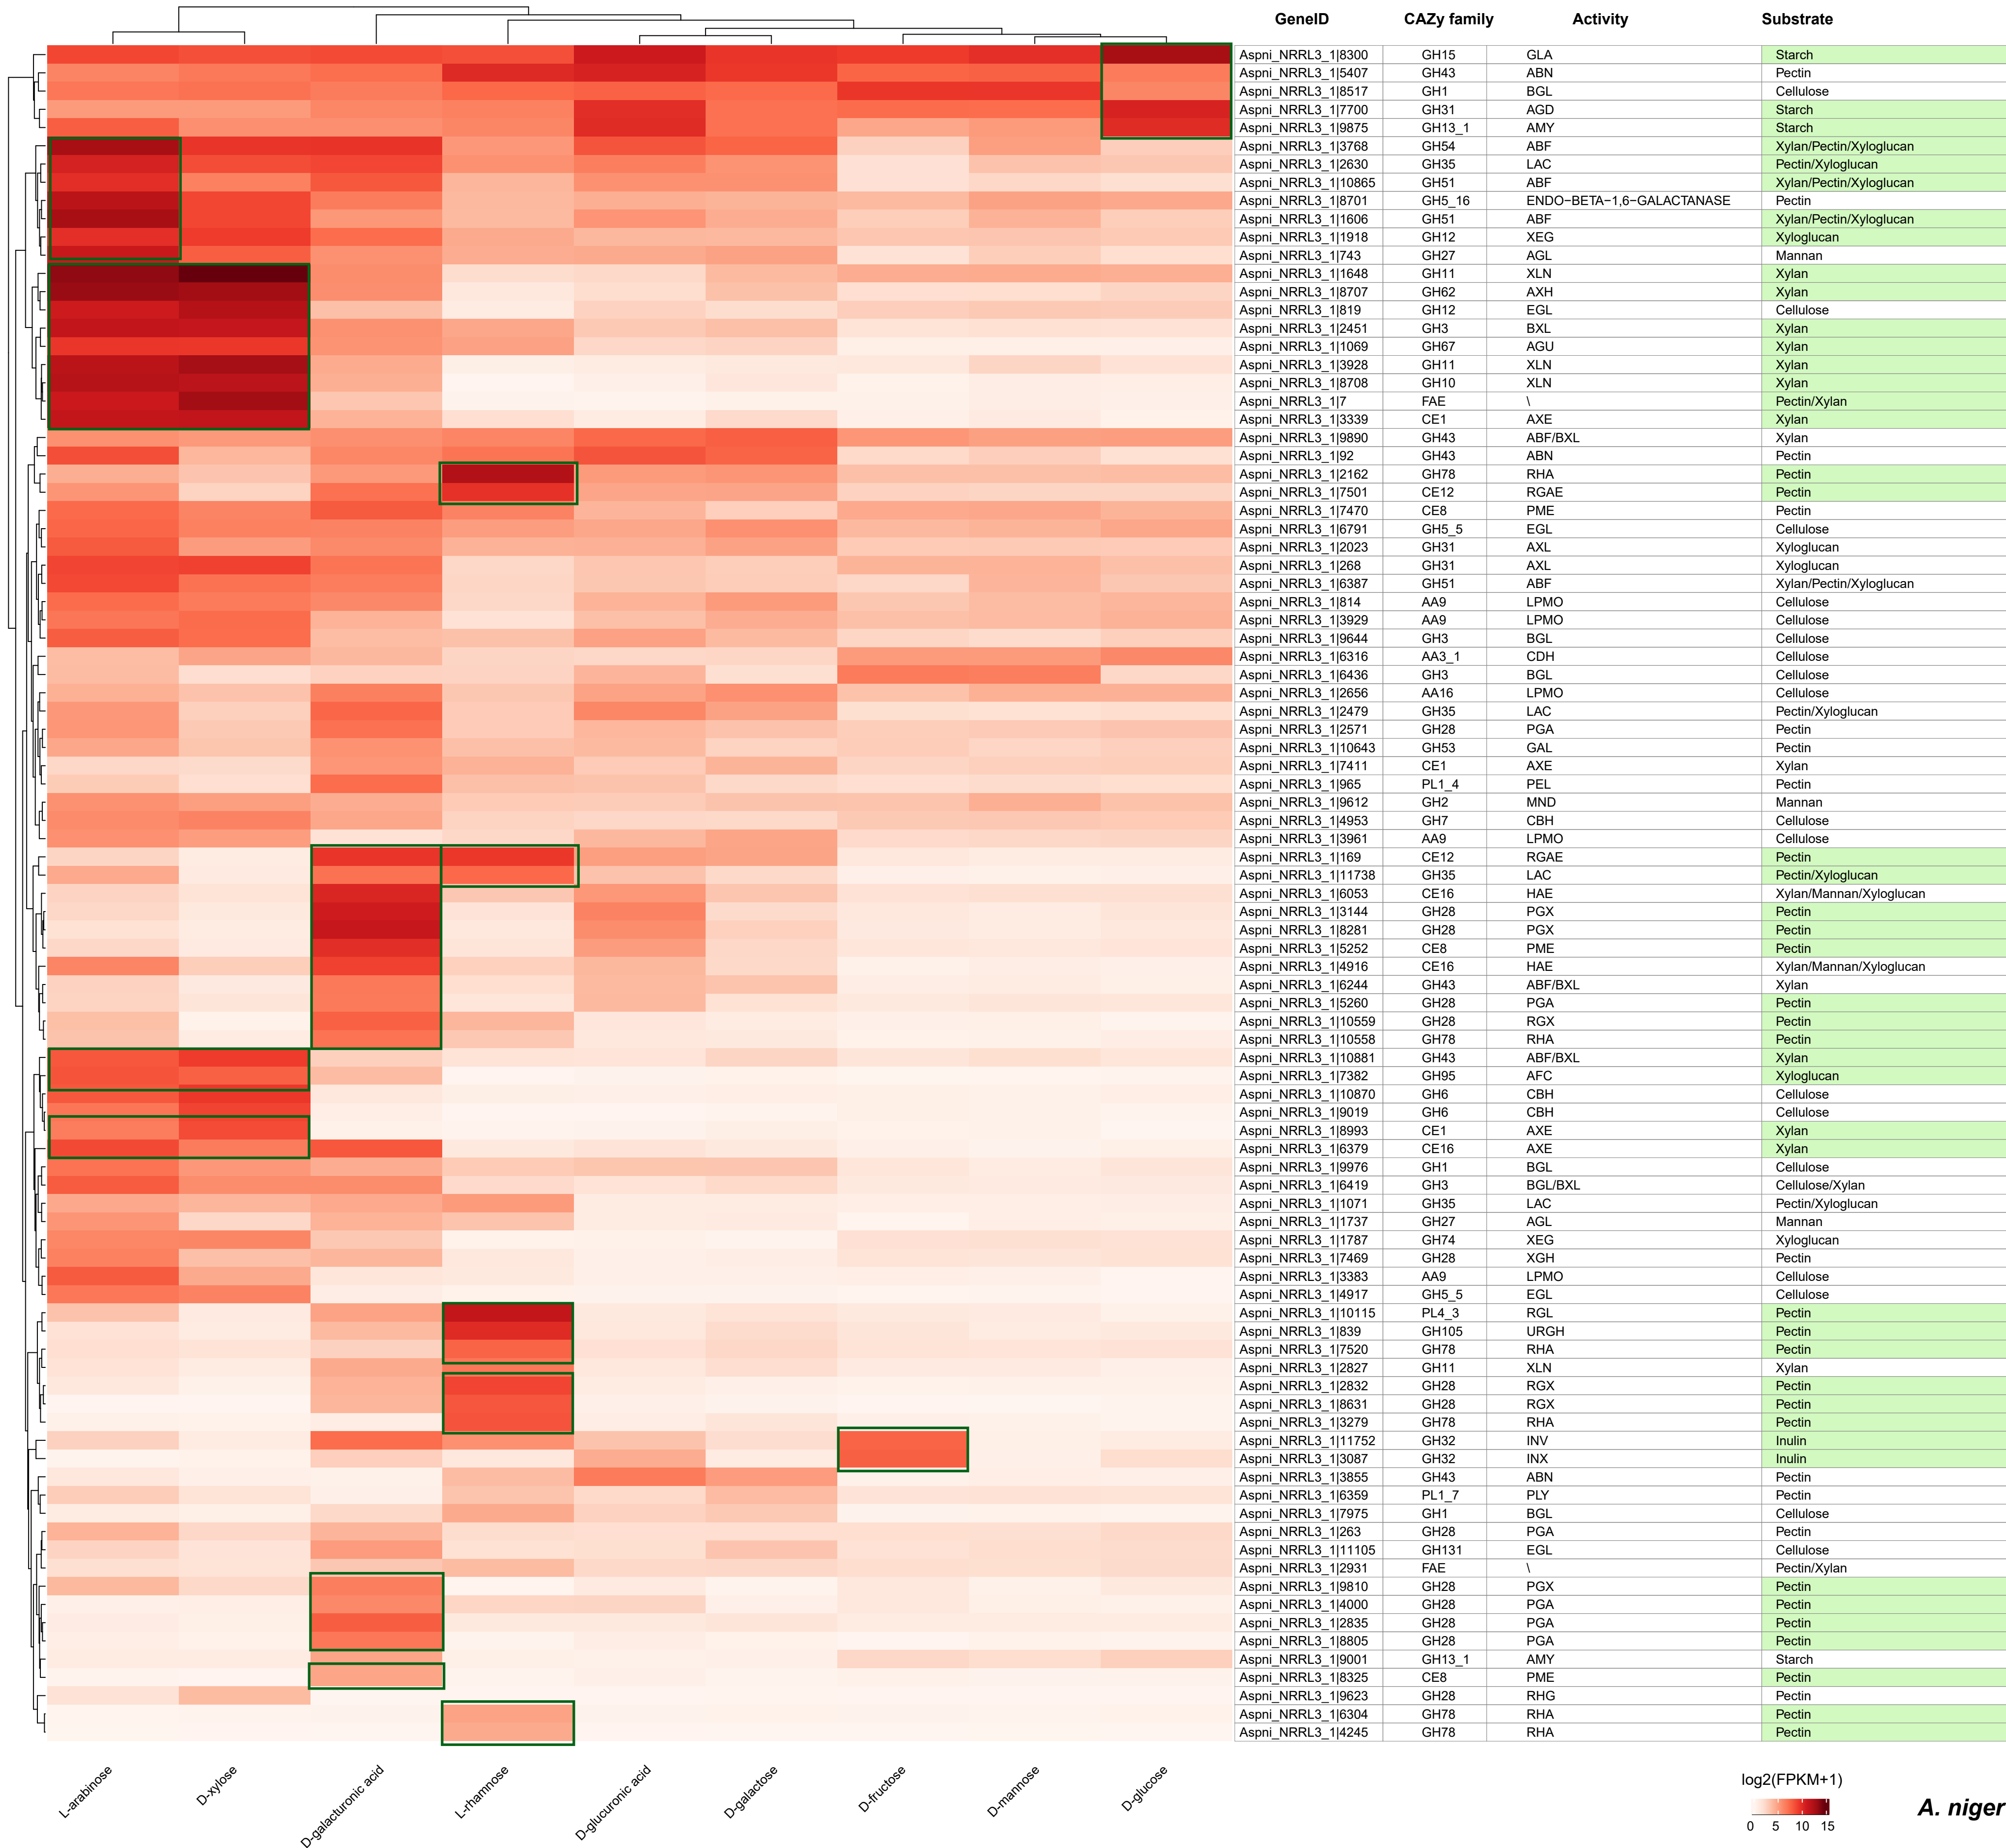

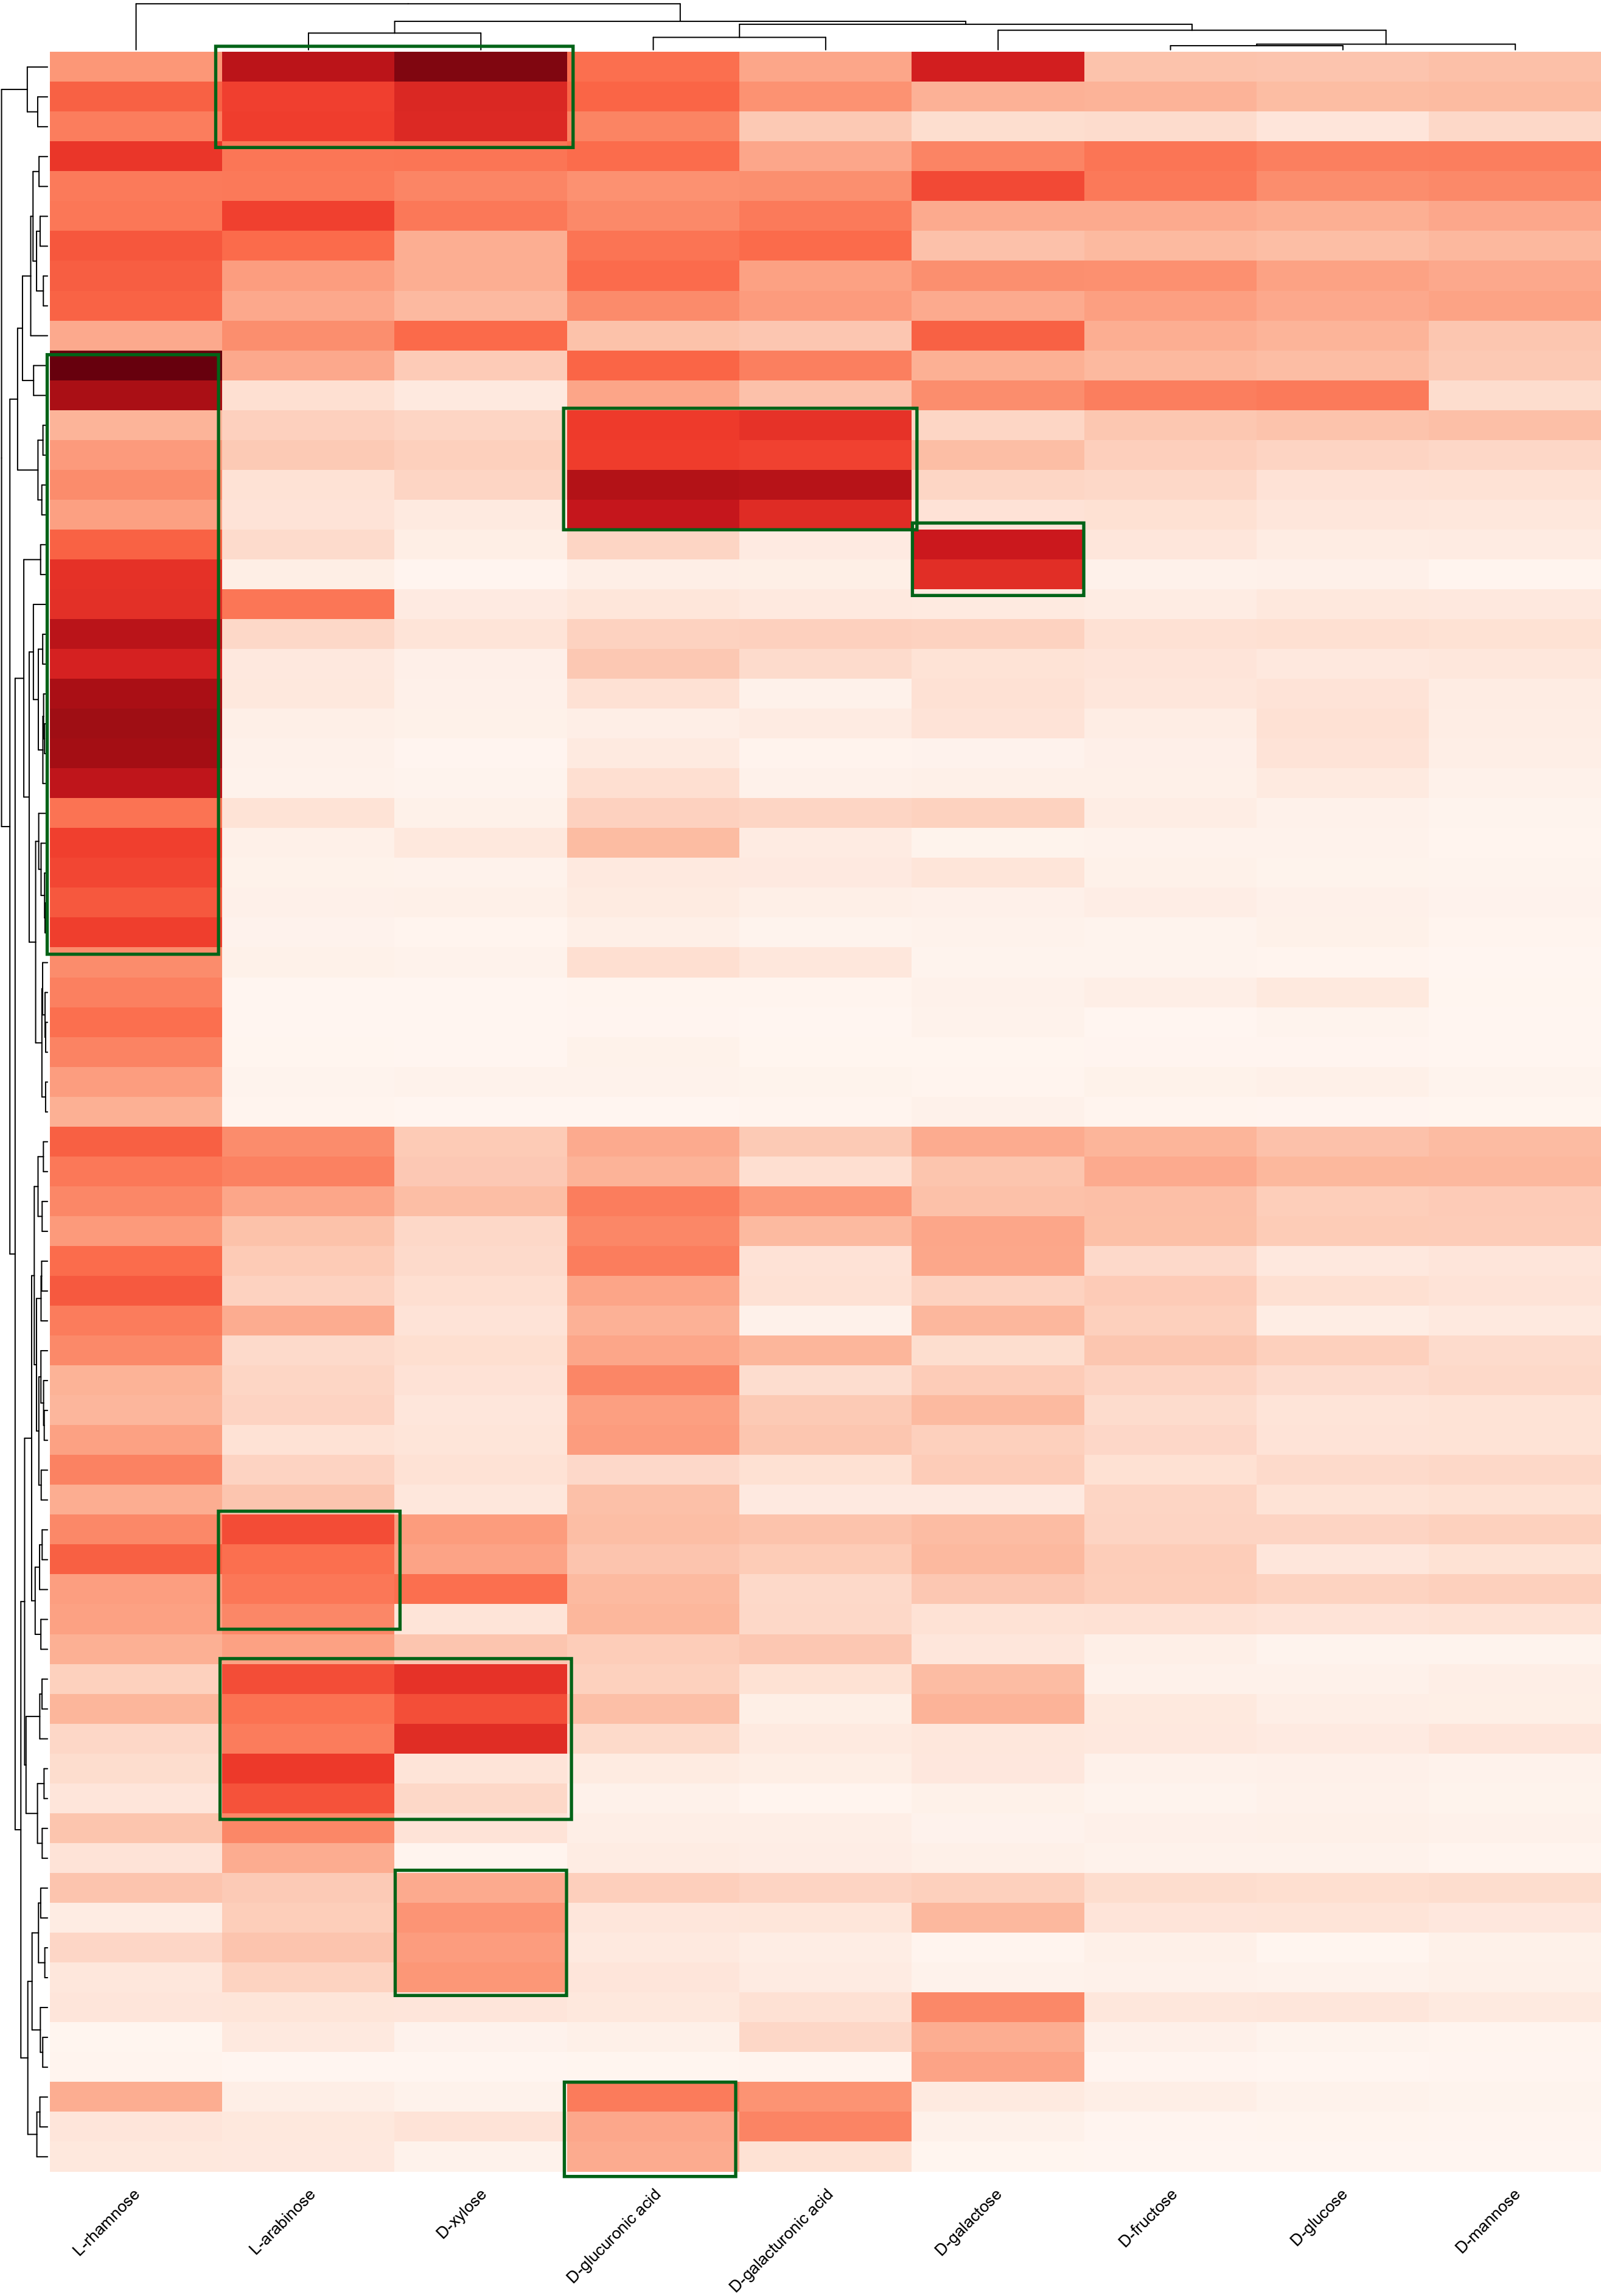

| GeneID        | CAZy family | Activity                  | Substrate               |
|---------------|-------------|---------------------------|-------------------------|
| Aspnid1 8110  | GH3         | BXL                       | Xylan                   |
| Aspnid1 7119  | GH43        | ABF/BXL                   | Xylan                   |
| Aspnid1 1280  | GH43        | ABF/BXL                   | Xylan                   |
| Aspnid1 1998  | GH3         | BGL                       | Cellulose               |
| Aspnid1 9090  | GH43        | ABN                       | Pectin                  |
| Aspnid1 5409  | GH51        | ABF                       | Xylan/Pectin/Xyloglucan |
| Aspnid1 3324  | GH31        | AXL                       | Xyloglucan              |
| Aspnid1 7563  | GH43        | ABF/BXL                   | Xylan                   |
| Aspnid1 5735  | GH35        | LAC                       | Pectin/Xyloglucan       |
| Aspnid1 1435  | GH43        | ABN                       | Pectin                  |
| Aspnid1 8918  | GH105       | URGH                      | Pectin                  |
| Aspnid1 6930  | GH31        | AGD                       | Starch                  |
| Aspnid1 267   | CE8         | PME                       | Pectin                  |
| Aspnid1 5232  | GH105       | URGH                      | Pectin                  |
| Aspnid1 7002  | GH28        | PGX                       | Pectin                  |
| Aspnid1 1049  | GH28        | PGX                       | Pectin                  |
| Aspnid1 8912  | GH2         | LAC                       | Pectin/Xyloglucan       |
| Aspnid1 2120  | GH88        | UGH                       | Pectin                  |
| Aspnid1 3654  | GH43        | ABF                       | Pectin/Xyloglucan       |
| Aspnid1 3832  | PL4_3       | RGL                       | Pectin                  |
| Aspnid1 5016  | GH78        | RHA                       | Pectin                  |
| Aspnid1 7934  | GH28        | RGX                       | Pectin                  |
| Aspnid1 3024  | GH78        | RHA                       | Pectin                  |
| Aspnid1 7933  | GH78        | RHA                       | Pectin                  |
| Aspnid1 1957  | PL4_3       | RGL                       | Pectin                  |
| Aspnid1 8705  | GH13_1      | AMY                       | Starch                  |
| Aspnid1 7478  | CE16        | AXE                       | Xylan                   |
| Aspnid1 9325  | CE12        | RGAE                      | Pectin                  |
| Aspnid1 8467  | GH1         | BGL                       | Cellulose               |
| Aspnid1 9766  | GH78        | RHA                       | Pectin                  |
| Aspnid1 9721  | GH88        | UGH                       | Pectin                  |
| Aspnid1 10445 | AA13        | LPMO                      | Starch                  |
| Aspnid1 2169  | GH3         | BGL                       | Cellulose               |
| Aspnid1 2748  | GH3         | BGL                       | Cellulose               |
| Aspnid1 4176  | AA13        | LPMO                      | Starch                  |
| Aspnid1 8691  | GH13_1      | AMY                       | Starch                  |
| Aspnid1 8232  | GH2         | LAC                       | Pectin/Xyloglucan       |
| Aspnid1 7769  | GH93        | ABX                       | Pectin                  |
| Aspnid1 7945  | GH3         | BGL/BXL                   | Cellulose/Xylan         |
| Aspnid1 6988  | GH15        | GLA                       | Starch                  |
| Aspnid1 7454  | FAE         | \                         | Pectin/Xylan            |
| Aspnid1 9332  | GH3         | BGL                       | Cellulose               |
| Aspnid1 1583  | GH36        | AGL                       | Mannan                  |
| Aspnid1 2674  | GH13_40     | AGD                       | Starch                  |
| Aspnid1 6028  | GH3         | BGL                       | Cellulose               |
| Aspnid1 6030  | GH78        | RHA                       | Pectin                  |
| Aspnid1 5590  | GH2         | MND                       | Mannan                  |
| Aspnid1 8306  | CE12        | RGAE                      | Pectin                  |
| Aspnid1 9685  | GH36        | AGL                       | Mannan                  |
| Aspnid1 10613 | GH78        | RHA                       | Pectin                  |
| Aspnid1 1595  | GH95        | AFC                       | Xyloglucan              |
| Aspnid1 6505  | GH31        | AXL                       | Xyloglucan              |
| Aspnid1 5977  | GH35        | LAC                       | Pectin/Xyloglucan       |
| Aspnid1 9020  | GH1         | BGL                       | Cellulose               |
| Aspnid1 1330  | GH62        | AXH                       | Xylan                   |
| Aspnid1 5129  | GH67        | AGU                       | Xylan                   |
| Aspnid1 7505  | GH10        | XLN                       | Xylan                   |
| Aspnid1 2882  | GH43        | ABF/BXL                   | Xylan                   |
| Aspnid1 2883  | GH43        | ABF/BXL                   | Xylan                   |
| Aspnid1 3023  | GH27        | AGL                       | Mannan                  |
| Aspnid1 7231  | GH54        | ABF                       | Xylan/Pectin/Xyloglucan |
| Aspnid1 4188  | CE1         | AXE                       | Xylan                   |
| Aspnid1 5214  | GH11        | XLN                       | Xylan                   |
| Aspnid1 2743  | GH10        | XLN                       | Xylan                   |
| Aspnid1 2560  | GH11        | XLN                       | Xylan                   |
| Aspnid1 2143  | GH105       | URGH                      | Pectin                  |
| Aspnid1 3436  | GH131       | EGL                       | Cellulose               |
| Aspnid1 8490  | GH5_16      | ENDO-BETA-1,6-GALACTANASE | Pectin                  |
| Aspnid1 3708  | GH105       | URGH                      | Pectin                  |
| Aspnid1 4821  | GH43        | ABF/BXL                   | Xylan                   |
| Aspnid1 9694  | GH3         | BXL                       | Xylan                   |

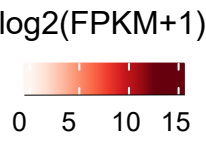

*A. nidulans*

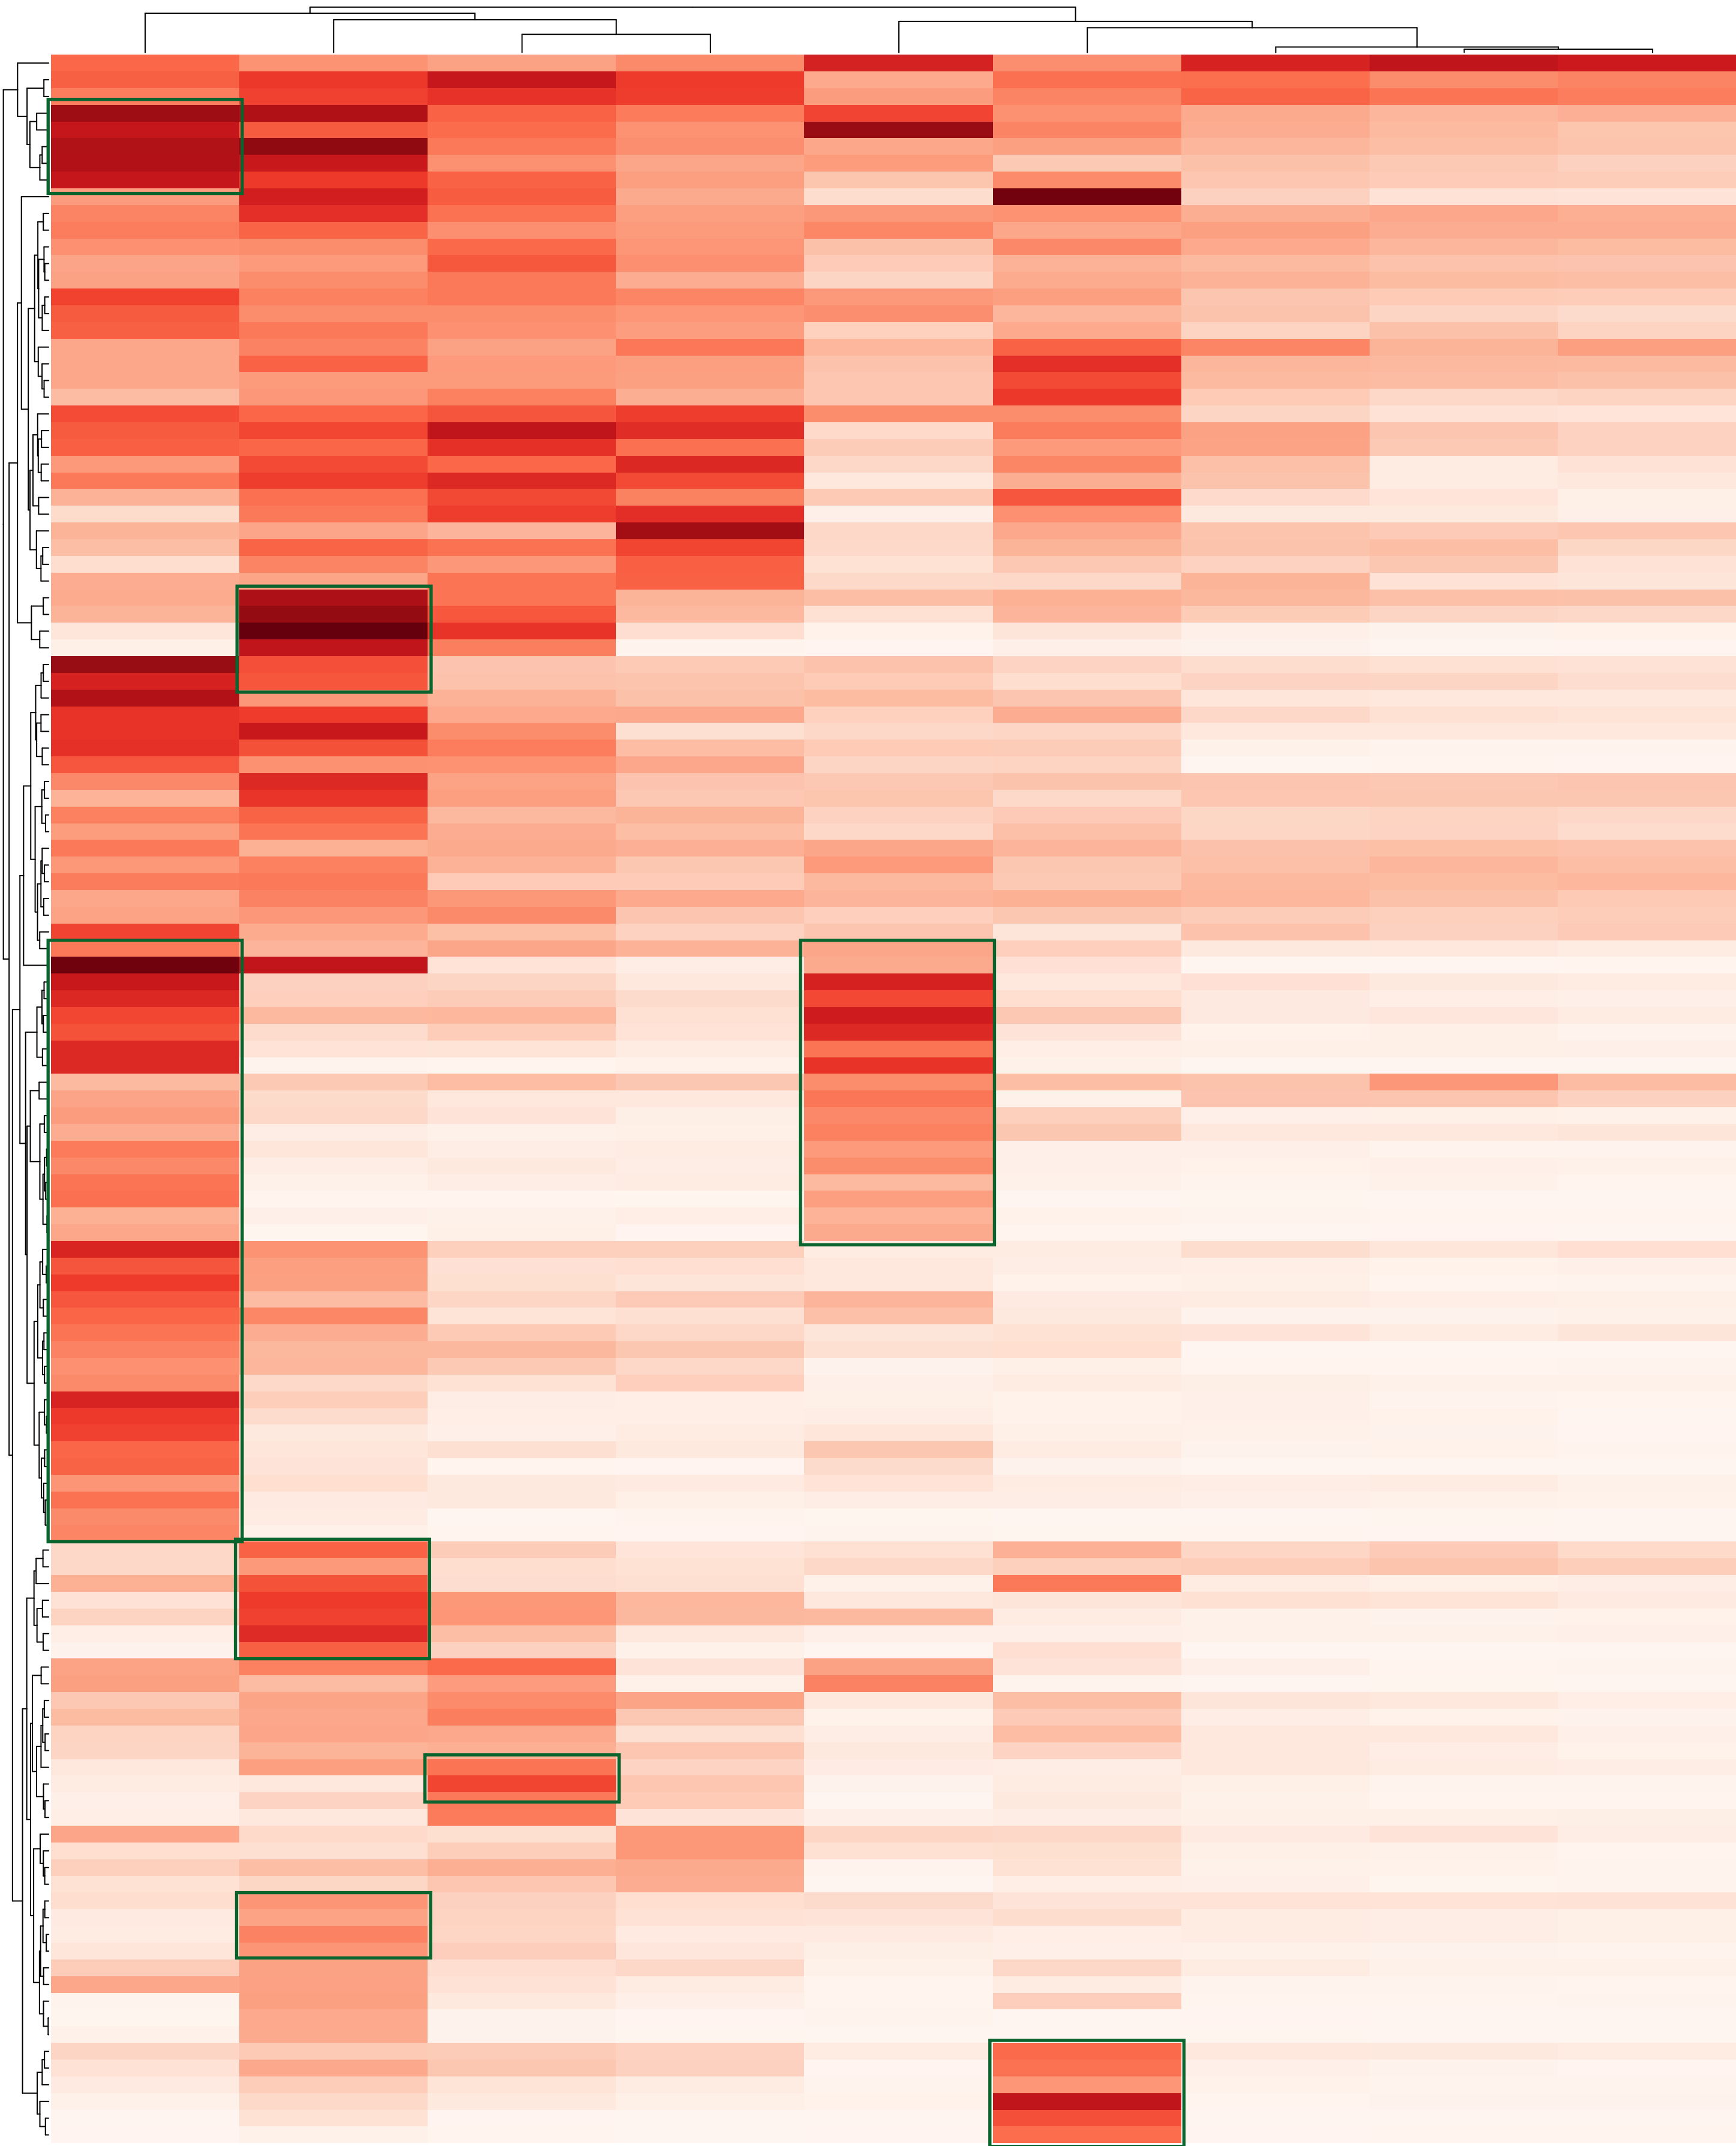

L-arabinose  
D-galacturonic acid  
D-glucuronic acid  
D-galactose  
D-xylose  
L-rhamnose  
D-fructose  
D-mannose  
D-glucose

| GeneID       | CAZy family | Activity | Substrate               |
|--------------|-------------|----------|-------------------------|
| Pensub110072 | GH13_1      | AMY      | Starch                  |
| Pensub112027 | GH3         | BGL      | Cellulose               |
| Pensub15932  | GH43        | ABN      | Pectin                  |
| Pensub12281  | GH51        | ABF      | Xylan/Pectin/Xyloglucan |
| Pensub113865 | GH43        | ABF/BXL  | Xylan                   |
| Pensub18128  | GH93        | ABX      | Pectin                  |
| Pensub113297 | GH51        | ABF      | Xylan/Pectin/Xyloglucan |
| Pensub16338  | GH35        | LAC      | Pectin/Xyloglucan       |
| Pensub16624  | GH105       | URGH     | Pectin                  |
| Pensub15035  | GH28        | PGA      | Pectin                  |
| Pensub16307  | AA16        | LPMO     | Cellulose               |
| Pensub110447 | GH27        | AGL      | Mannan                  |
| Pensub110078 | GH36        | AGL      | Mannan                  |
| Pensub17144  | GH3         | BGL      | Cellulose               |
| Pensub111443 | GH35        | LAC      | Pectin/Xyloglucan       |
| Pensub15870  | GH11        | XLN      | Xylan                   |
| Pensub14688  | GH31        | AXL      | Xyloglucan              |
| Pensub17928  | GH15        | GLA      | Starch                  |
| Pensub19802  | PL4_3       | RGL      | Pectin                  |
| Pensub113664 | GH115       | AGU      | Xylan                   |
| Pensub111222 | GH78        | RHA      | Pectin                  |
| Pensub12053  | GH27        | AGL      | Mannan                  |
| Pensub1848   | GH27        | AGL      | Mannan                  |
| Pensub17307  | GH32        | INX      | Inulin                  |
| Pensub18031  | GH15        | GLA      | Starch                  |
| Pensub111945 | GH2         | LAC      | Pectin/Xyloglucan       |
| Pensub12371  | GH43        | ABN      | Pectin                  |
| Pensub1532   | CE5         | AXE      | Xylan                   |
| Pensub111416 | GH2         | LAC      | Pectin/Xyloglucan       |
| Pensub1362   | GH13_40     | AGD      | Starch                  |
| Pensub1361   | GH13_40     | AGD      | Starch                  |
| Pensub110931 | GH32        | INV      | Inulin                  |
| Pensub1759   | GH28        | PGX      | Pectin                  |
| Pensub12263  | CE8         | PME      | Pectin                  |
| Pensub11655  | GH28        | PGX      | Pectin                  |
| Pensub110256 | GH28        | PGA      | Pectin                  |
| Pensub111001 | GH43        | ABF      | Pectin/Xyloglucan       |
| Pensub14395  | GH27        | AGL      | Mannan                  |
| Pensub13399  | GH62        | AXH      | Xylan                   |
| Pensub18890  | GH1         | BGL      | Cellulose               |
| Pensub14796  | GH3         | BGL/BXL  | Cellulose/Xylan         |
| Pensub111908 | GH95        | AFC      | Xyloglucan              |
| Pensub13477  | GH27        | AGL      | Mannan                  |
| Pensub19719  | GH35        | LAC      | Pectin/Xyloglucan       |
| Pensub114178 | GH28        | PGA      | Pectin                  |
| Pensub112847 | GH2         | MND      | Mannan                  |
| Pensub112201 | GH53        | GAL      | Pectin                  |
| Pensub16027  | GH62        | AXH      | Xylan                   |
| Pensub111114 | GH5_5       | EGL      | Cellulose               |
| Pensub16250  | GH1         | BGL      | Cellulose               |
| Pensub16581  | AA9         | LPMO     | Cellulose               |
| Pensub19639  | GH3         | BGL      | Cellulose               |
| Pensub12294  | GH7         | CBH      | Cellulose               |
| Pensub19765  | GH29        | AFC      | Xyloglucan              |
| Pensub11940  | GH54        | ABF      | Xylan/Pectin/Xyloglucan |
| Pensub13510  | GH43        | ABF/BXL  | Xylan                   |
| Pensub111745 | GH43        | ABF/BXL  | Xylan                   |
| Pensub18222  | GH5_22      | EGL      | Cellulose               |
| Pensub15092  | GH5_22      | EGL      | Cellulose               |
| Pensub113043 | GH10        | XLN      | Xylan                   |
| Pensub11444  | GH11        | XLN      | Xylan                   |
| Pensub18824  | CE5         | AXE      | Xylan                   |
| Pensub17375  | GH11        | XLN      | Xylan                   |
| Pensub19764  | GH3         | BXL      | Xylan                   |
| Pensub16031  | GH43        | ABF/BXL  | Xylan                   |
| Pensub113445 | GH10        | XLN      | Xylan                   |
| Pensub13512  | GH93        | ABX      | Pectin                  |
| Pensub112441 | GH10        | XLN      | Xylan                   |
| Pensub11664  | GH51        | ABF      | Xylan/Pectin/Xyloglucan |
| Pensub15782  | FAE         | \        | Pectin/Xylan            |
| Pensub13511  | GH3         | BXL      | Xylan                   |
| Pensub13364  | GH54        | ABF      | Xylan/Pectin/Xyloglucan |
| Pensub112883 | GH62        | AXH      | Xylan                   |
| Pensub112472 | GH62        | AXH      | Xylan                   |
| Pensub16540  | GH3         | BGL/BXL  | Cellulose/Xylan         |
| Pensub114040 | GH43        | ABF/BXL  | Xylan                   |
| Pensub16394  | GH31        | AXL      | Xyloglucan              |
| Pensub13476  | GH27        | AGL      | Mannan                  |
| Pensub17184  | CE1         | AXE      | Xylan                   |
| Pensub112473 | GH43        | ABF/BXL  | Xylan                   |
| Pensub112887 | GH43        | ABF/BXL  | Xylan                   |
| Pensub14845  | GH43        | ABF/BXL  | Xylan                   |
| Pensub14850  | GH54        | ABF      | Xylan/Pectin/Xyloglucan |
| Pensub13894  | GH141       | AFC      | Xyloglucan              |
| Pensub16724  | GH54        | ABF      | Xylan/Pectin/Xyloglucan |
| Pensub13895  | GH36        | AGL      | Mannan                  |
| Pensub112771 | GH43        | ABF/BXL  | Xylan                   |
| Pensub13365  | GH43        | ABF/BXL  | Xylan                   |
| Pensub16856  | GH43        | ABF/BXL  | Xylan                   |
| Pensub112088 | GH28        | RGX      | Pectin                  |
| Pensub112089 | GH78        | RHA      | Pectin                  |
| Pensub112261 | GH35        | LAC      | Pectin/Xyloglucan       |
| Pensub16125  | PL1_7       | PLY      | Pectin                  |
| Pensub113623 | GH43        | ABF/BXL  | Xylan                   |
| Pensub14486  | GH28        | PGA      | Pectin                  |
| Pensub13595  | CE16        | HAE      | Xylan/Mannan/Xyloglucan |
| Pensub17919  | GH67        | AGU      | Xylan                   |
| Pensub17918  | GH30_7      | EXL      | Xylan                   |
| Pensub18192  | GH28        | RGX      | Pectin                  |
| Pensub12516  | GH35        | LAC      | Pectin/Xyloglucan       |
| Pensub11378  | GH88        | UGH      | Pectin                  |
| Pensub17796  | AA9         | LPMO     | Cellulose               |
| Pensub12020  | FAE         | \        | Pectin/Xylan            |
| Pensub11286  | FAE         | \        | Pectin/Xylan            |
| Pensub16610  | GH1         | BGL      | Cellulose               |
| Pensub11906  | GH3         | BGL      | Cellulose               |
| Pensub19846  | CE5         | AXE      | Xylan                   |
| Pensub11352  | CE16        | HAE      | Xylan/Mannan/Xyloglucan |
| Pensub113084 | GH31        | AGD      | Starch                  |
| Pensub16750  | CE1         | AXE      | Xylan                   |
| Pensub11735  | PL1_4       | PEL      | Pectin                  |
| Pensub1698   | GH28        | XGH      | Pectin                  |
| Pensub110774 | GH28        | PGA      | Pectin                  |
| Pensub1699   | CE8         | PME      | Pectin                  |
| Pensub12527  | GH36        | AGL      | Mannan                  |
| Pensub18889  | GH95        | AFC      | Xyloglucan              |
| Pensub18310  | CE12        | RGAE     | Pectin                  |
| Pensub16034  | CE8         | PME      | Pectin                  |
| Pensub15036  | GH5_5       | EGL      | Cellulose               |
| Pensub16051  | GH78        | RHA      | Pectin                  |
| Pensub1520   | CE12        | RGAE     | Pectin                  |
| Pensub113232 | CE16        | HAE      | Xylan/Mannan/Xyloglucan |
| Pensub113583 | GH78        | RHA      | Pectin                  |
| Pensub113618 | GH28        | RGX      | Pectin                  |
| Pensub113338 | GH78        | RHA      | Pectin                  |

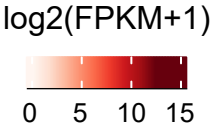

*P. subrubescens*



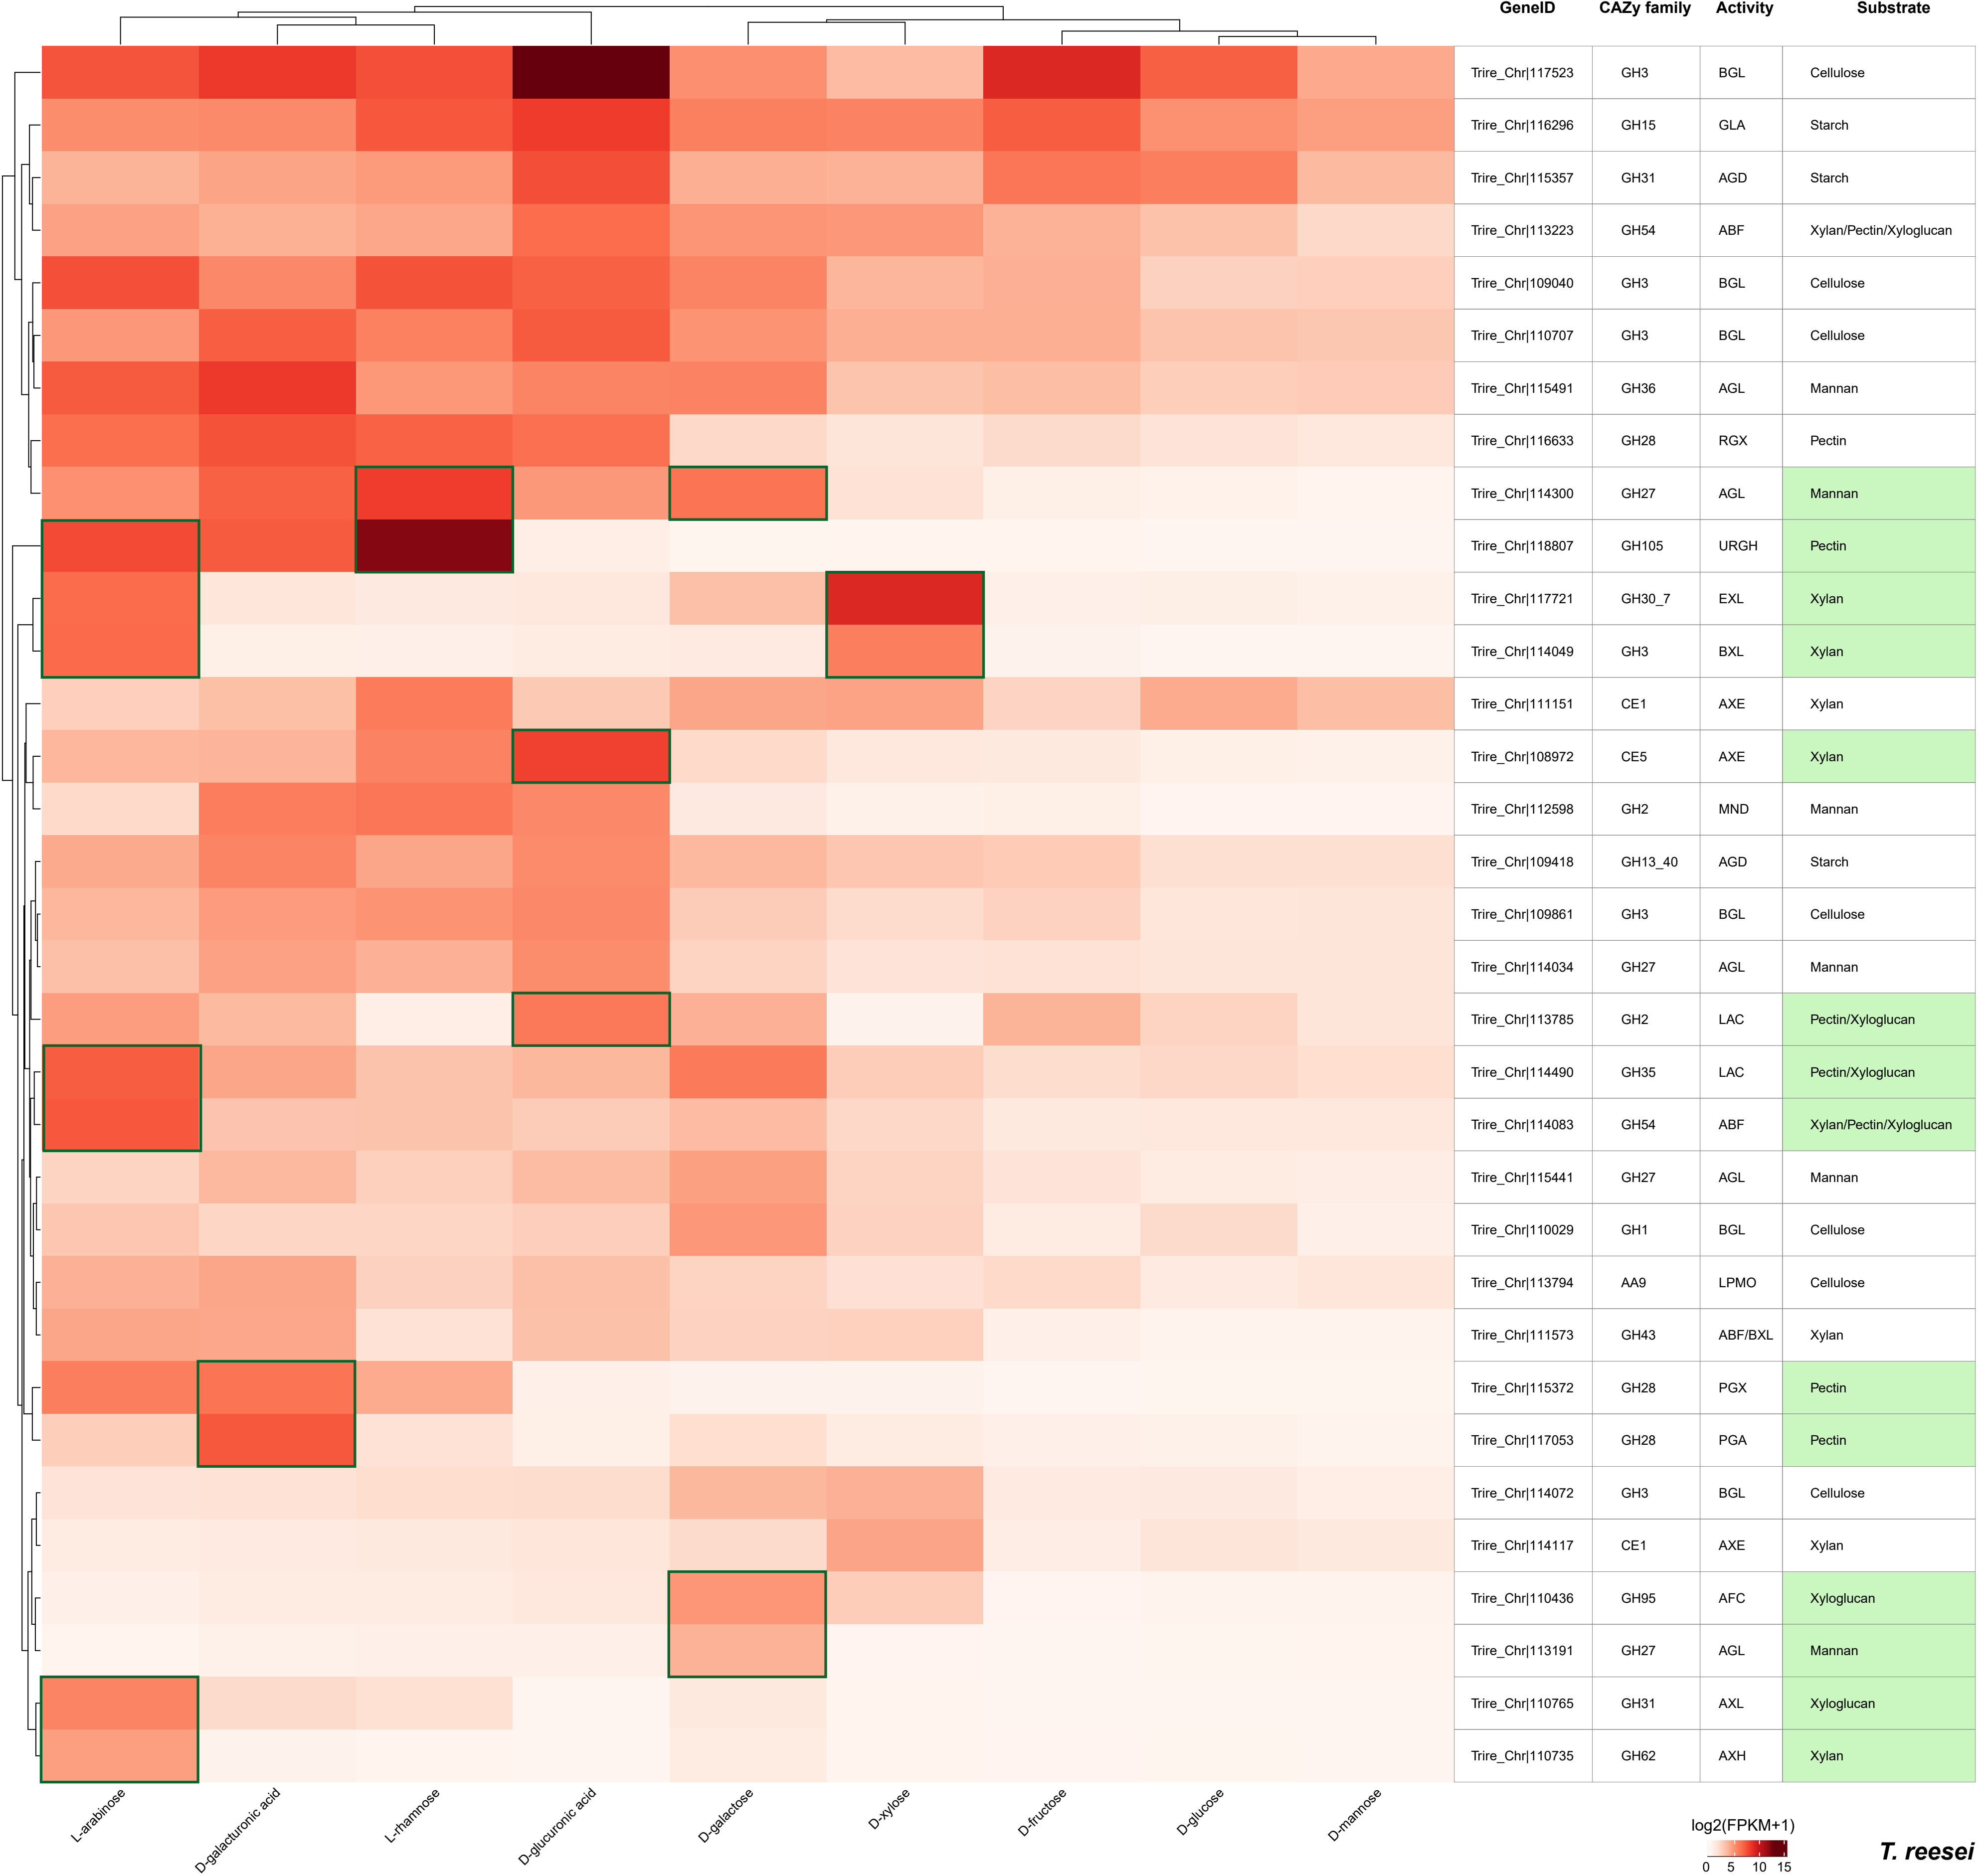

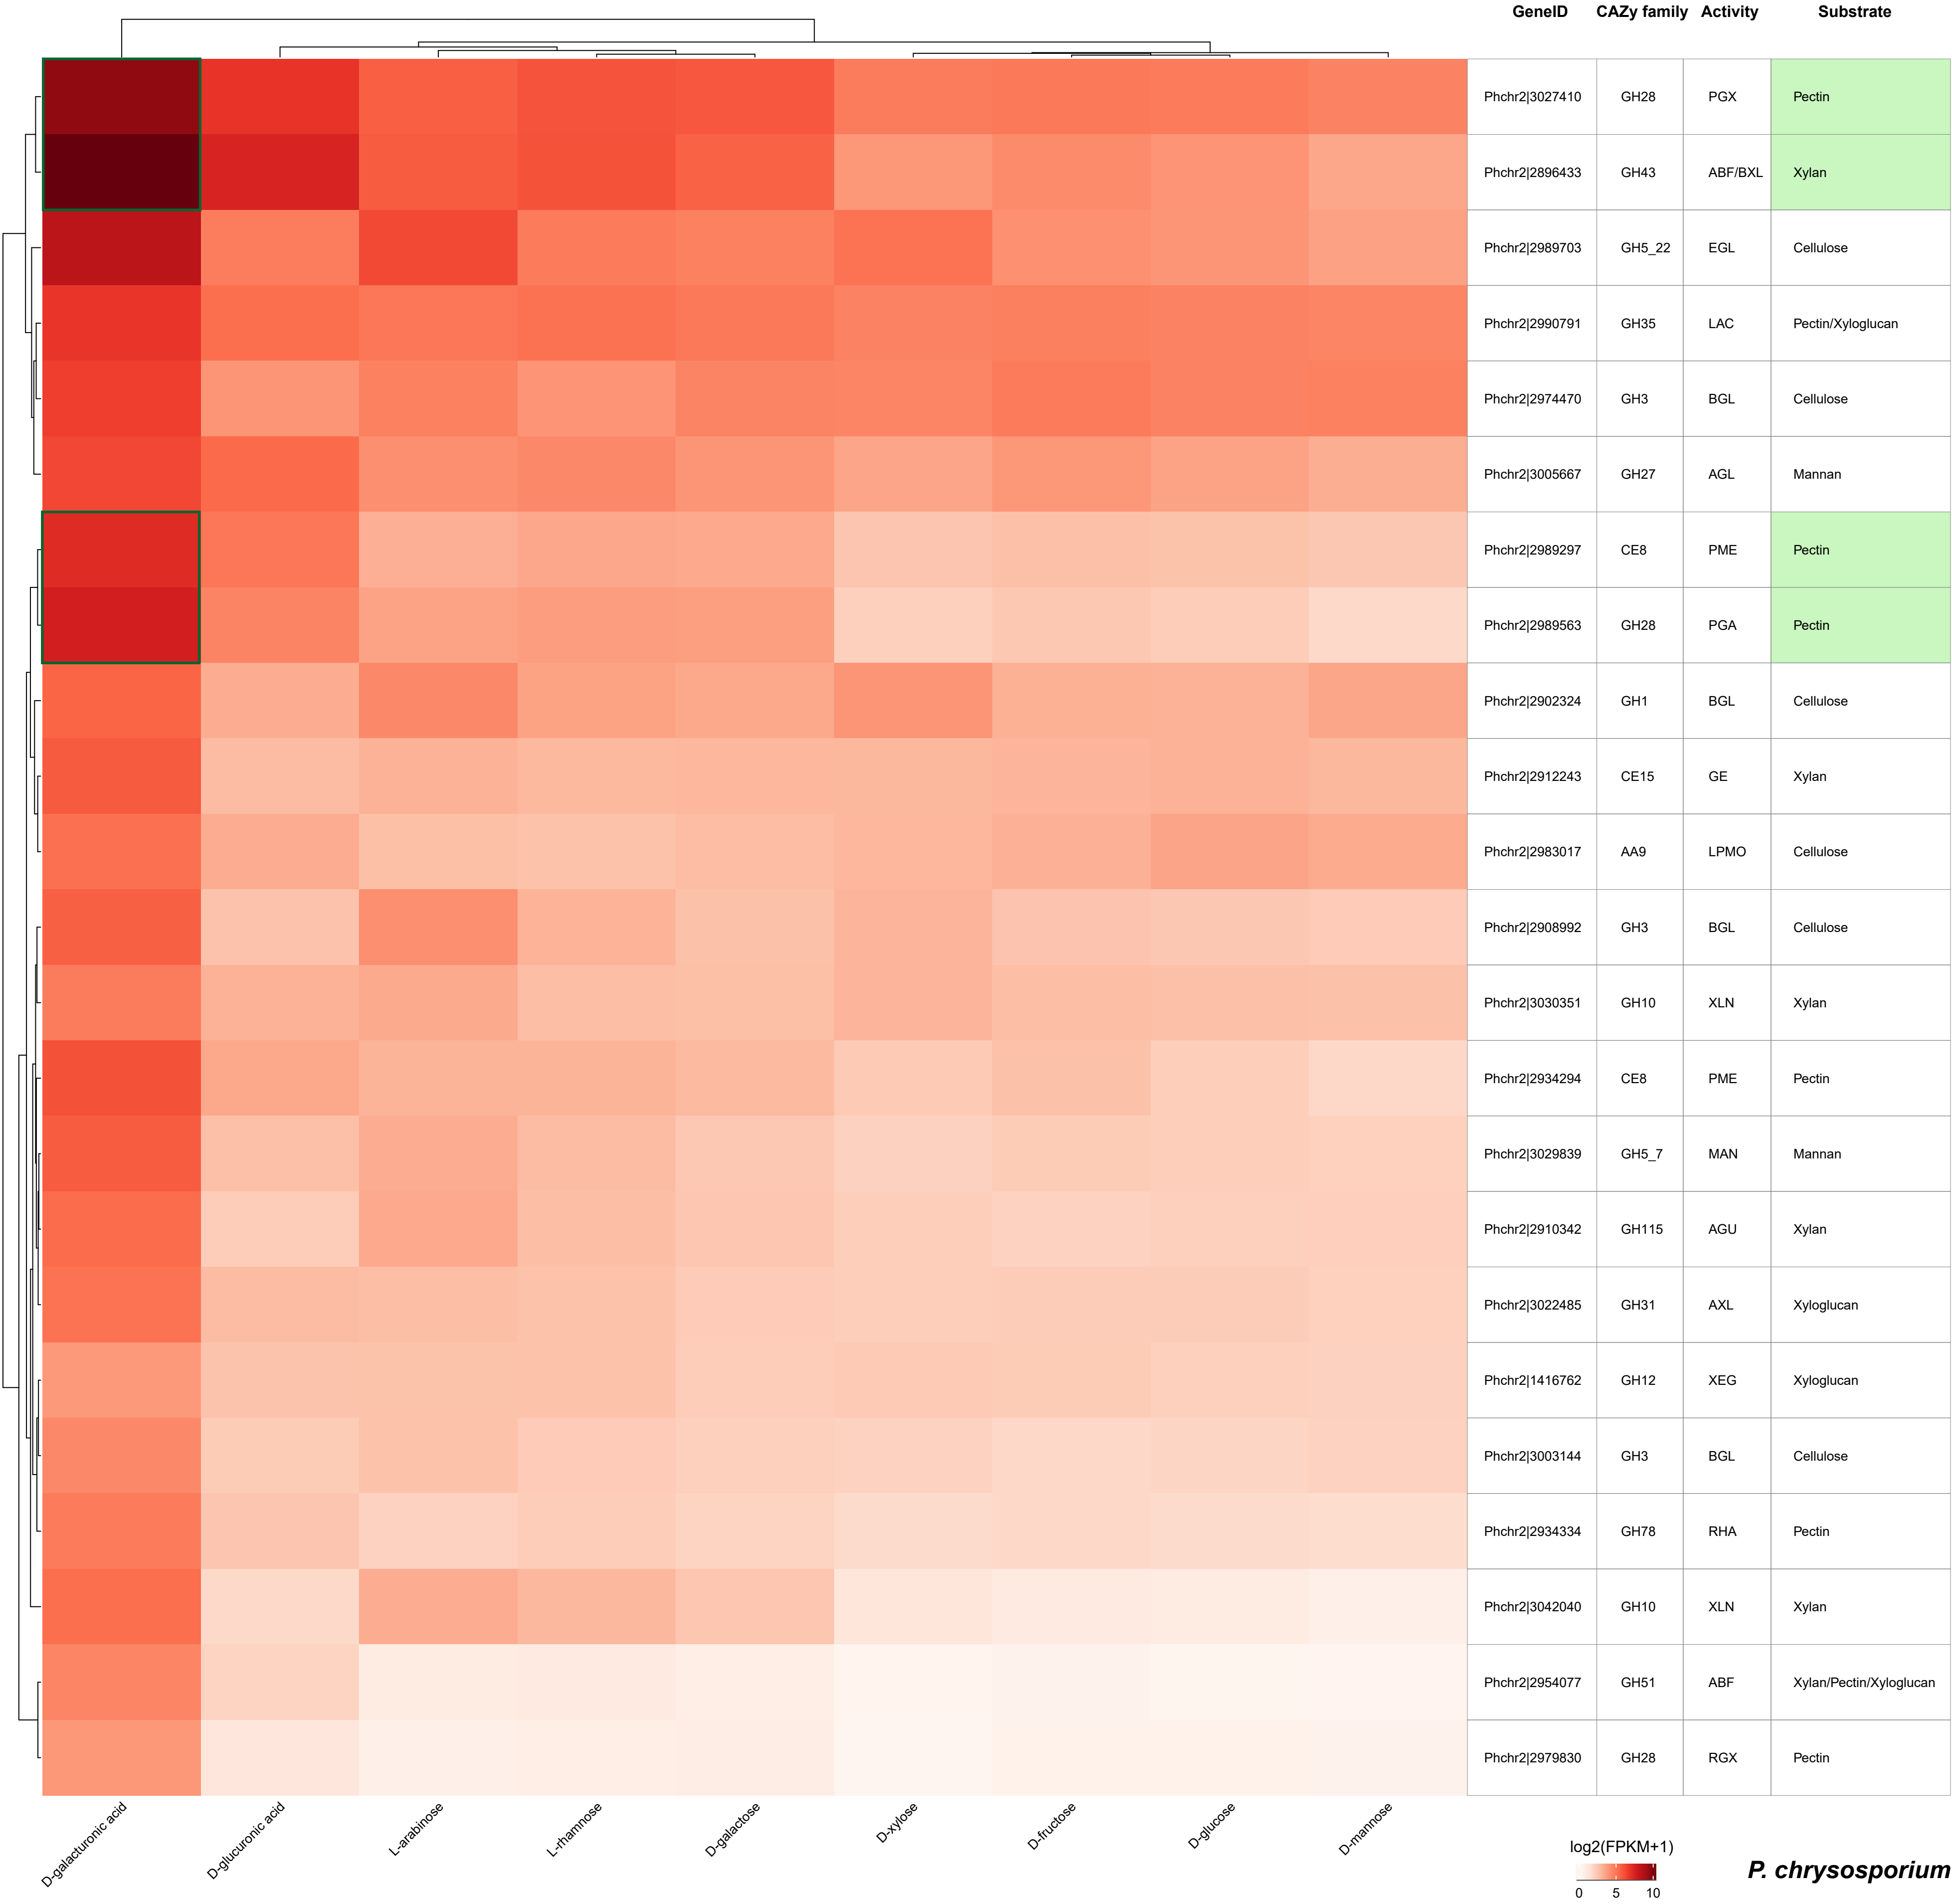

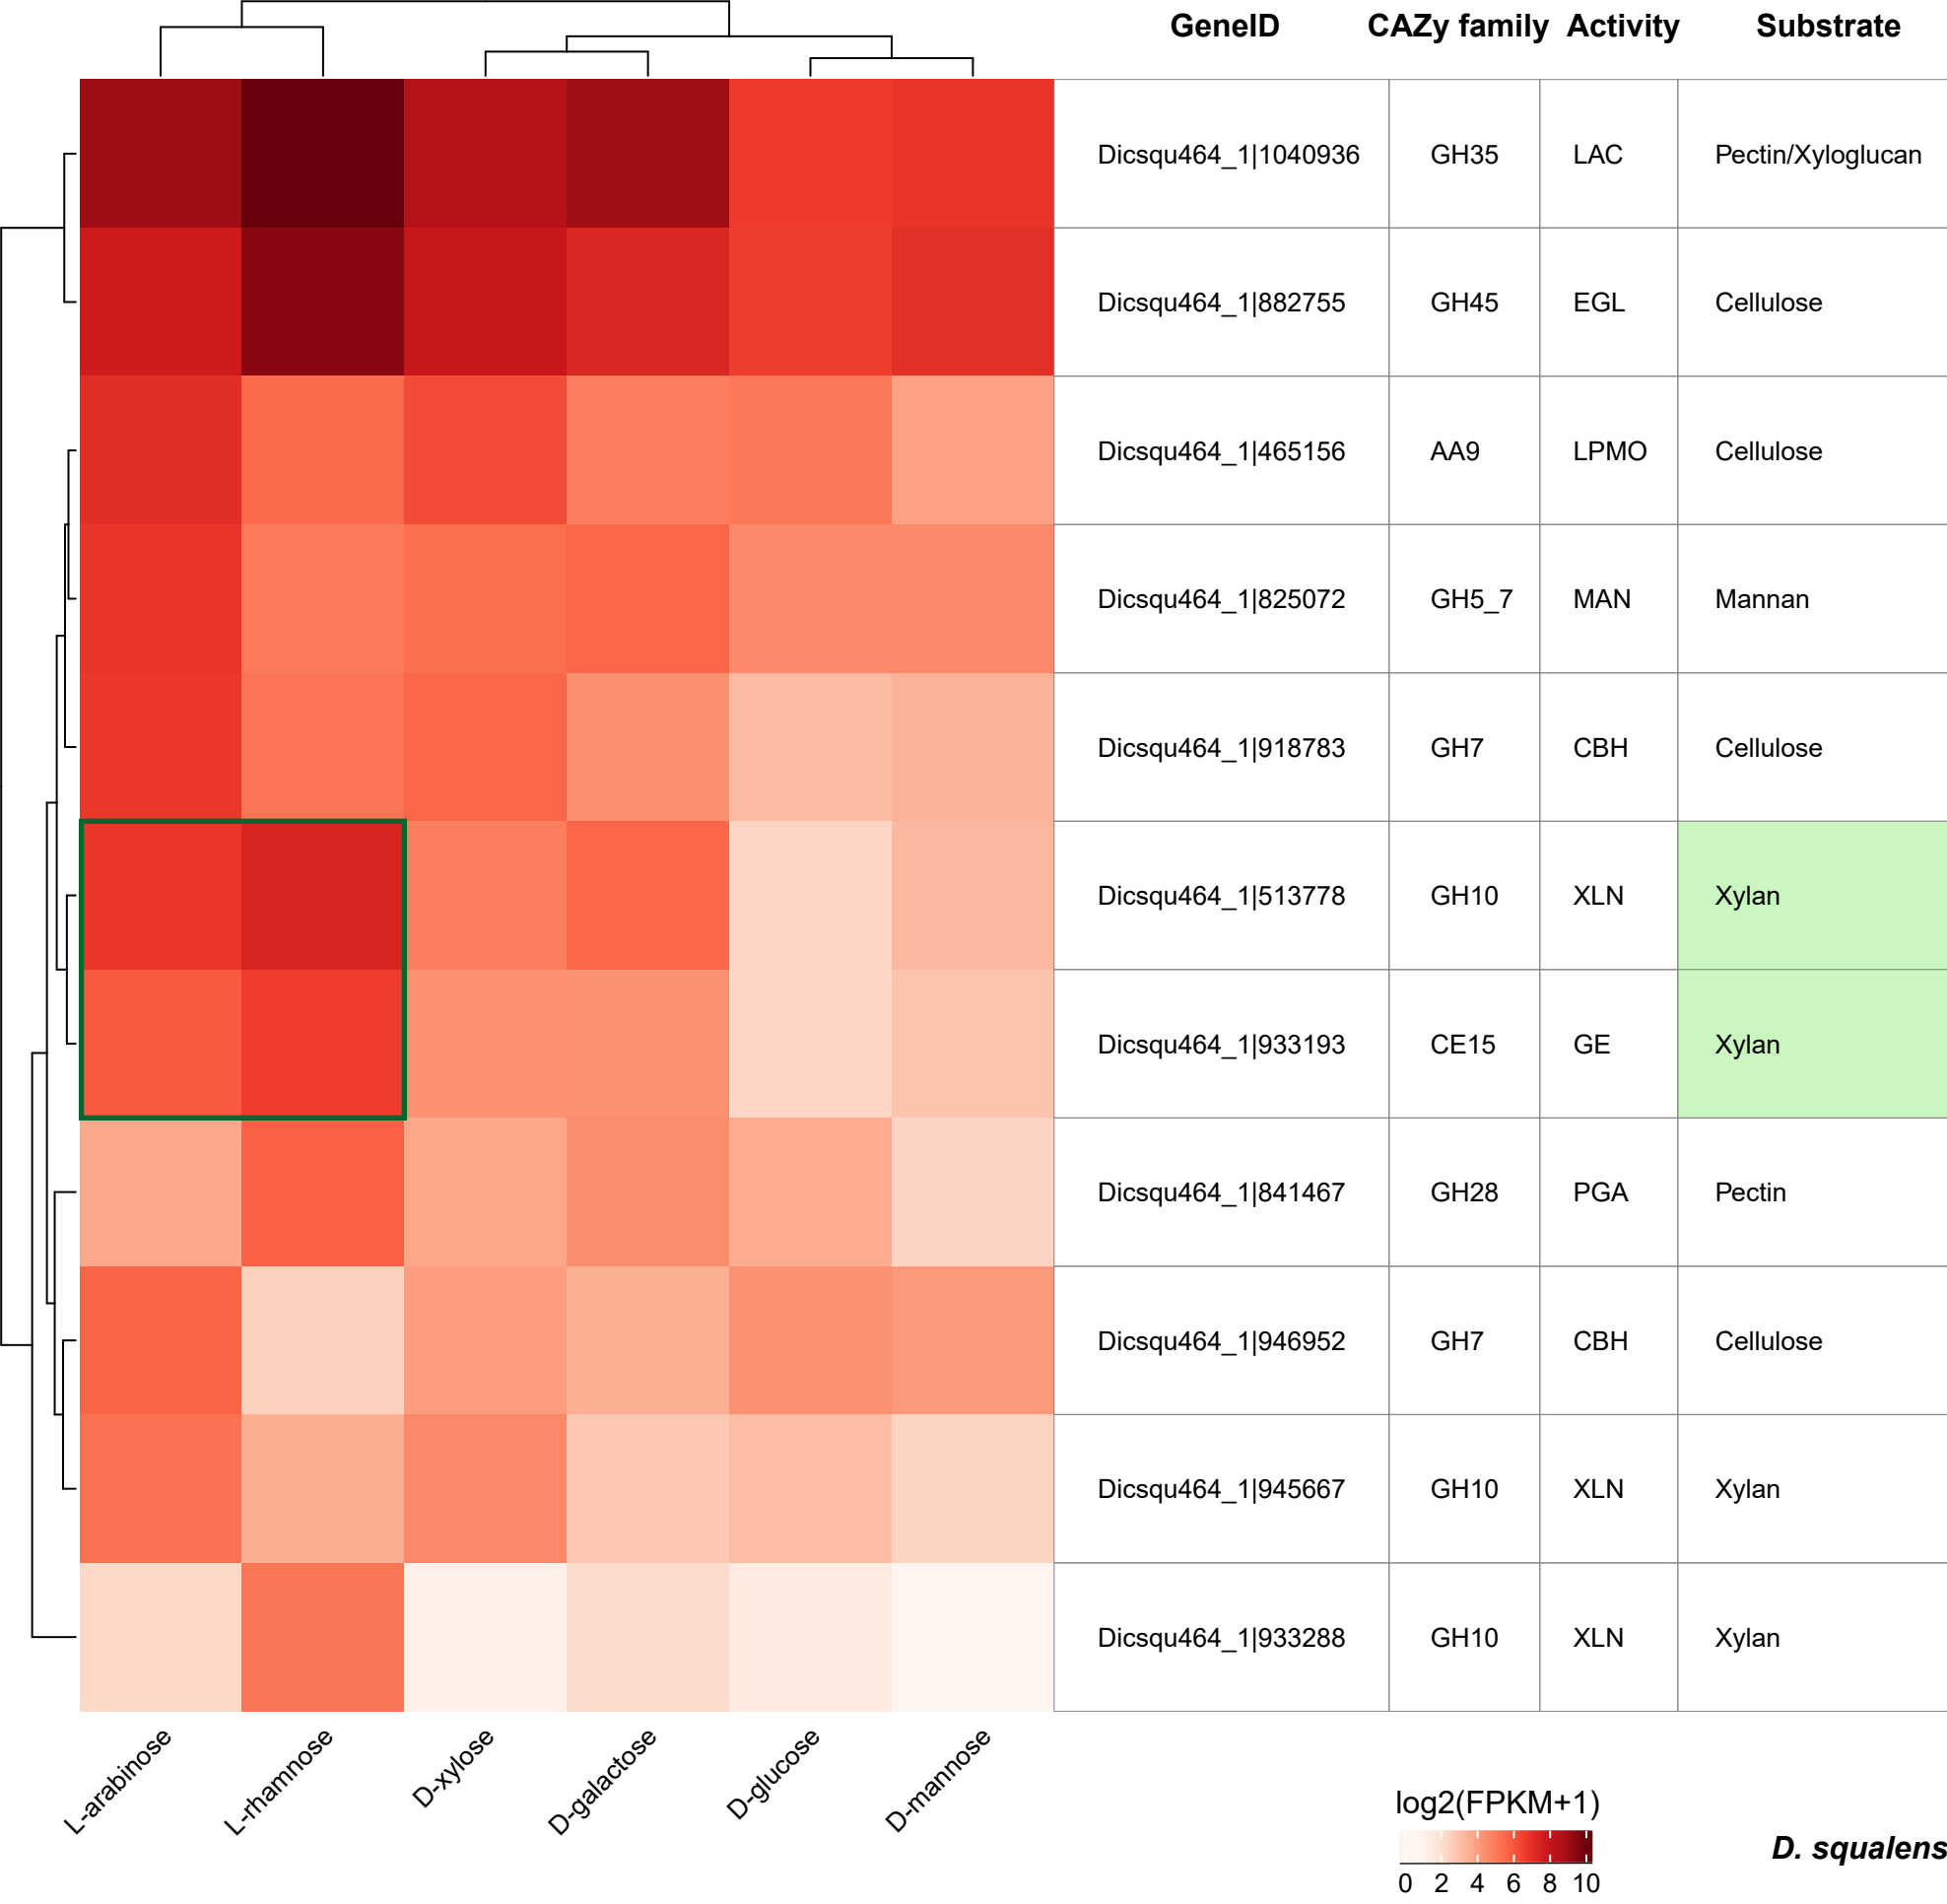

Supplement: s1 [file s1]
