# Supplementary figures and images for: Comparative Genomics and Transcriptomics Analyses Reveal Divergent Plant Biomass-Degrading Strategies in Fungi
Source: MDPI journal article supplement (doi:10.3390/jof9080860), 2023-08-18

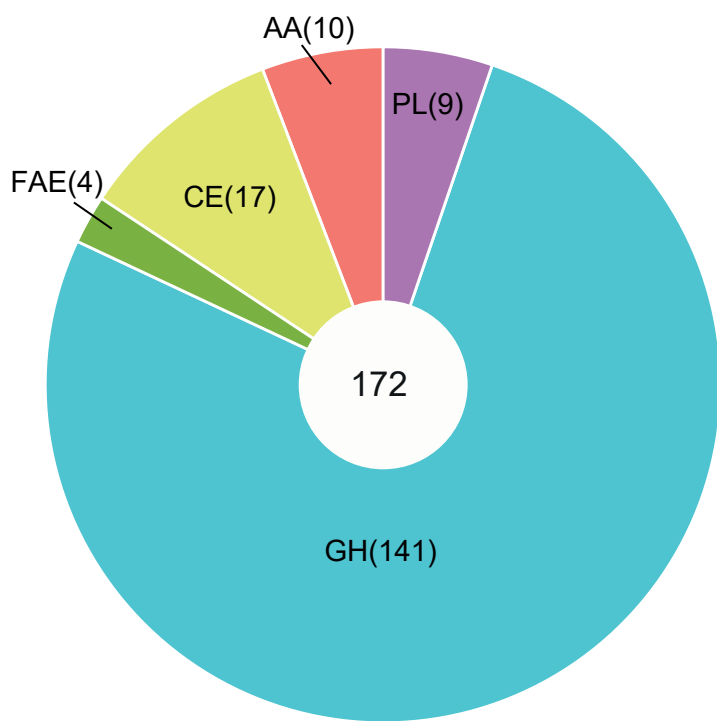

**A. *A. niger***

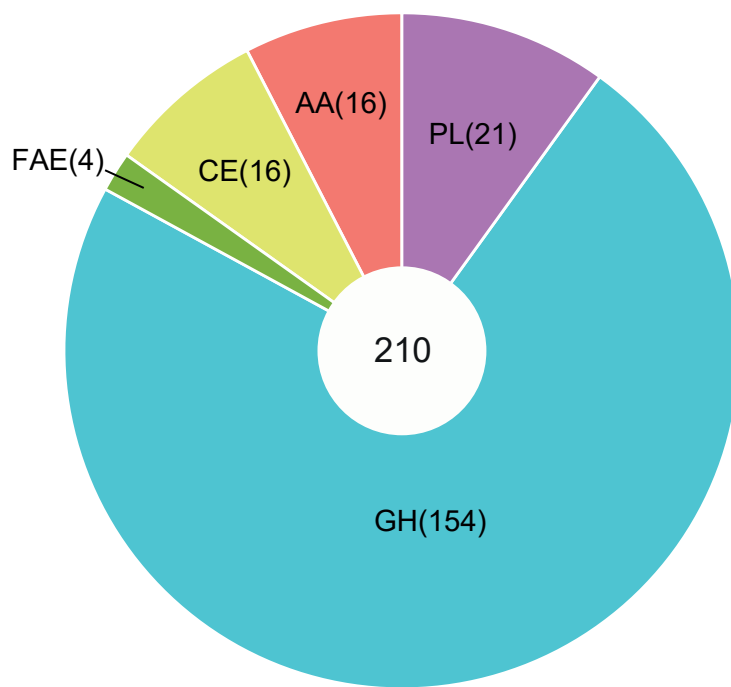

**B. *A. nidulans***

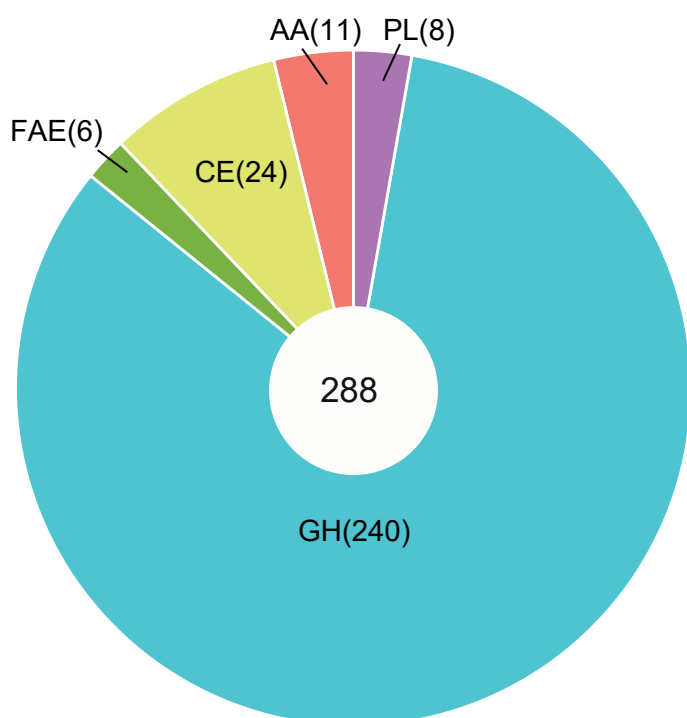

**C. *P. subrubescens***

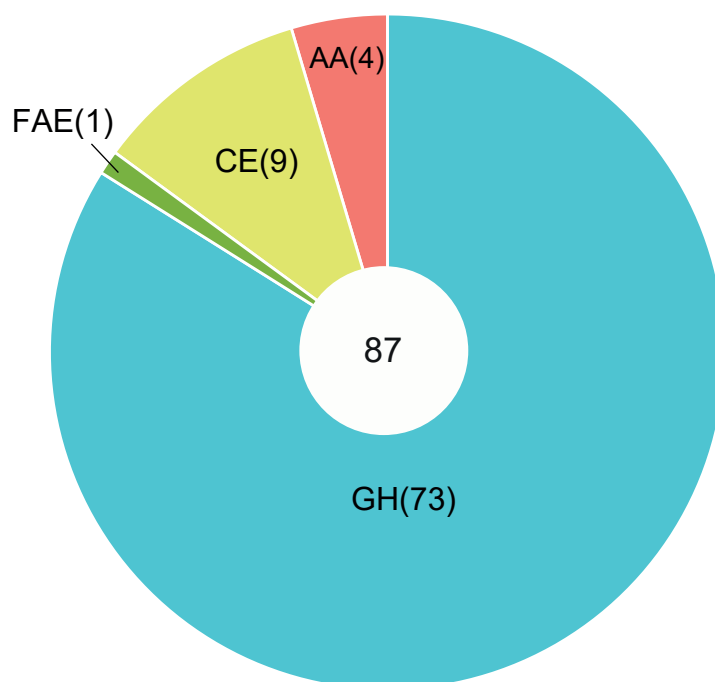

**D. *T. reesei***

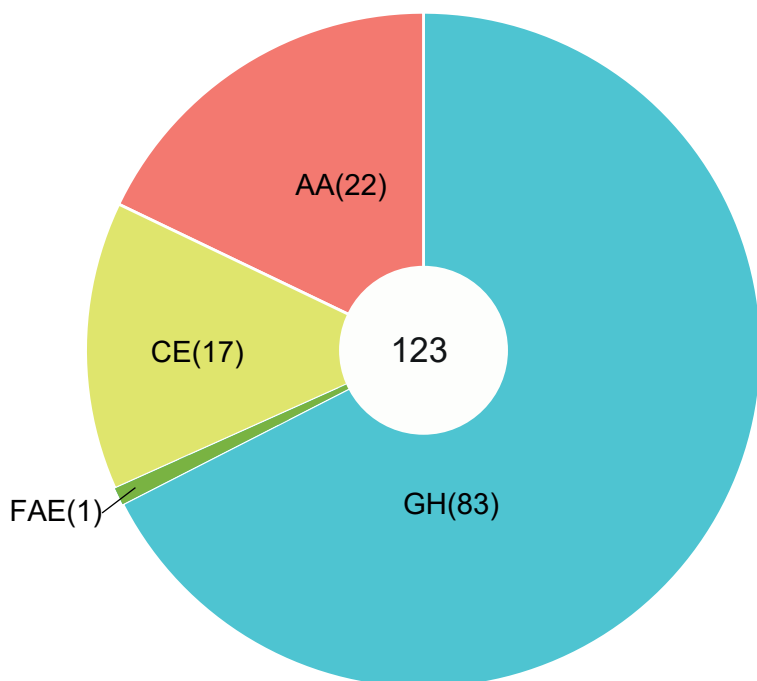

**E. *P. chrysosporium***

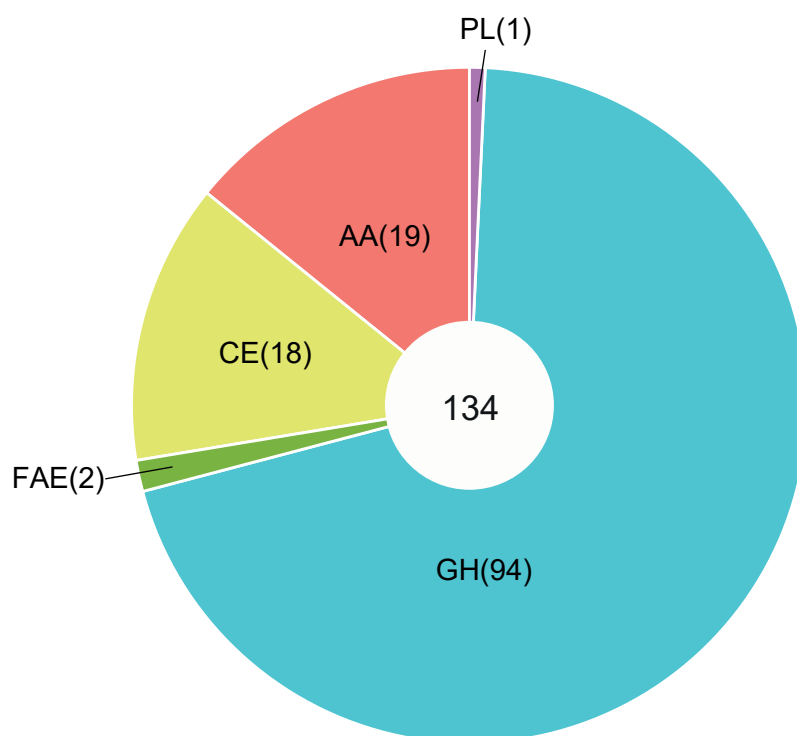

**F. *D. squalens***

Supplement: s1 [file s1]

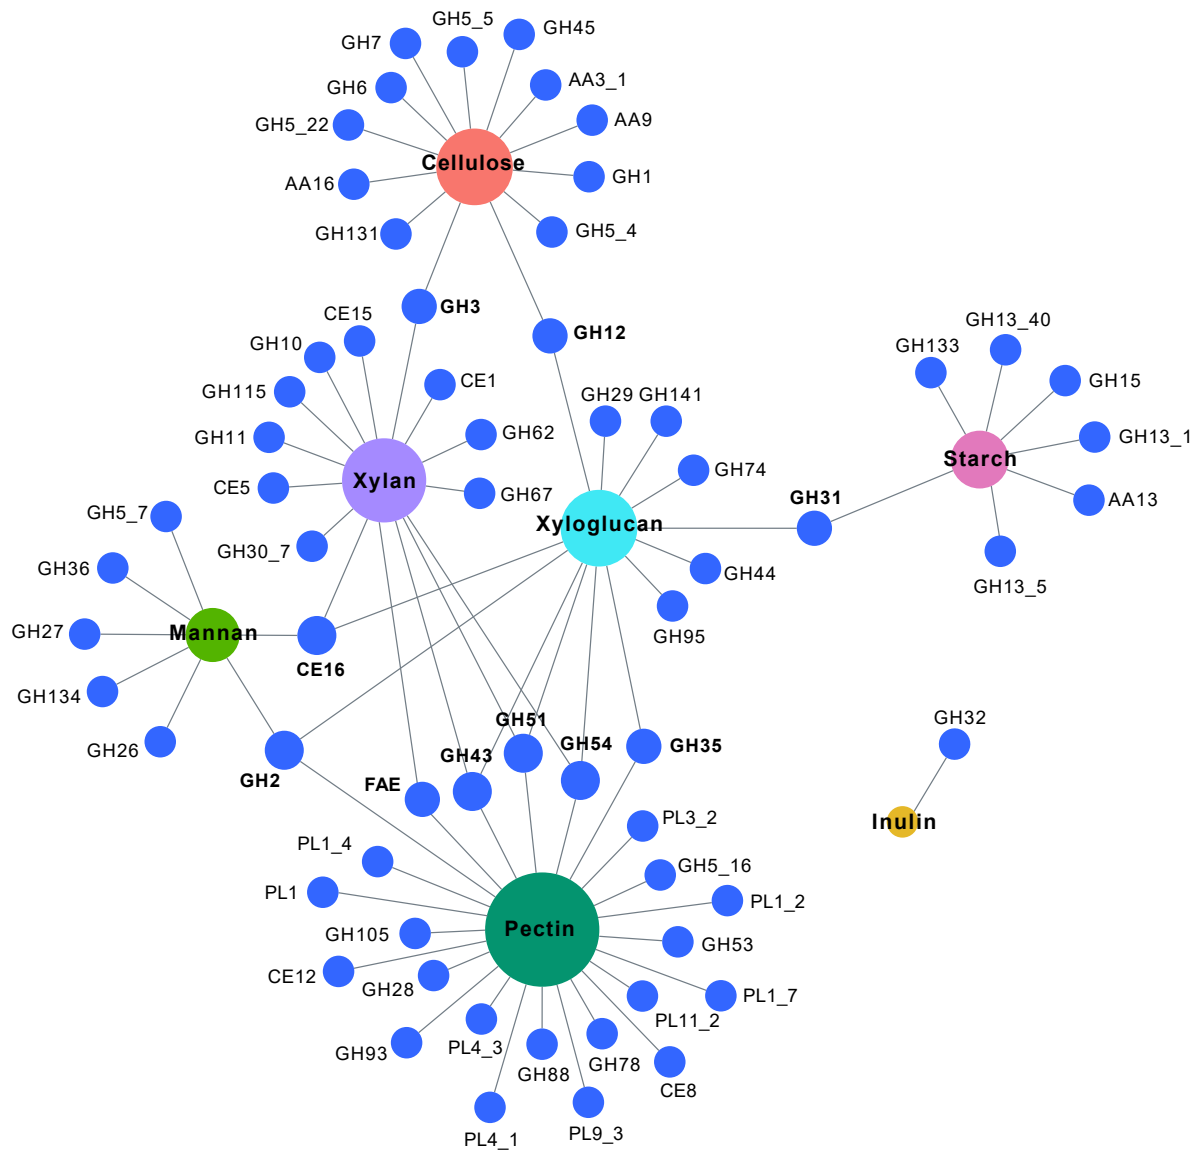

Supplement: s1 [file s1]
